# Supplementary material for: Variability among the Isolates of Broad Bean Mottle Virus and Encapsidation of Host RNAs
Source: MDPI journal article supplement (doi:10.3390/pathogens11070817), 2022-07-21
Supplement: s1 [file s1]

|                    |                                                                                                                        |
|--------------------|------------------------------------------------------------------------------------------------------------------------|
| Consensus Identity | 1 10 20 30 40 50 60 70 80<br>MSSFVNLESLISERGANCRGADEIVNNEATRILTSQLEHSQRSKKVNI RNKLSVAECDAFRARYGGAFDVLNLTHEYTAPHS       |
| 1. LyV 1a          | MSSFVNLESLISERGANCRGADEIVNNEATRILTSQLEHSQRSKKVNI RNKLSVAECDAFRARYGGAFDVLNLTHEYTAPHS                                    |
| 2. MV 1a           | MSSFVNLESLISERGANCRGADEIVNNEATRILTSQLEHSQRSKKVNI RNKLSVAECDAFRARYGGAFDVLNLTHEYTAPHS                                    |
| 3. SV 1a           | MSSFVNLESLISERGANCRGADEIVNNEATRILTSQLEHSQRSKKVNI RNKLSVAECDAFRARYGGAFDVLNLTHEYTAPHS                                    |
| 4. TU 1a           | MSSFVNLESLISERGANCRGADEIVNNEATRILTSQLEHSQRSKKVNI RNKLSVAECDAFRARYGGAFDVLNLTHEYTAPHS                                    |
| 5. TV 1a           | MSSFVNLESLISERGANCRGADEIVNNEATRILTSQLEHSQRSKKVNI RNKLSVAECDAFRARYGGAFDVLNLTHEYTAPHS                                    |
| 6. Ba 1a           | MSSFVNLESLISERGANCRGADEIVNNEATRILTSQLEHSQRSKKVNI RNKLSVAECDAFRARYGGAFDVLNLTHEYTAPHS                                    |
| Consensus Identity | 90 100 110 120 130 140 150 160<br>LAGALRVAEHFDCIDSFPPEDKIIDFGGSQLHHYSRGDNRVHSSCCPI LGPRDATRHEERMCLRLKMMVQTSDRFVEVPDFCL |
| 1. LyV 1a          | LAGALRVAEHFDCIDSFPPEDKIIDFGGSQLHHYSRGDNRVHSSCCPI LGPRDATRHEERMCLRLKMMVQTSDRFVEVPDFCL                                   |
| 2. MV 1a           | LAGALRVAEHFDCIDSFPPEDKIIDFGGSQLHHYSRGDNRVHSSCCPI LGPRDATRHEERMCLRLKMMVQTSDRFVEVPDFCL                                   |
| 3. SV 1a           | LAGALRVAEHFDCIDSFPPEDKIIDFGGSQLHHYSRGDNRVHSSCCPI LGPRDATRHEERMCLRLKMMVQTSDRFVEVPDFCL                                   |
| 4. TU 1a           | LAGALRVAEHFDCIDSFPPEDKIIDFGGSQLHHYSRGDNRVHSSCCPI LGPRDATRHEERMCLRLKMMVQTSDRFVEVPDFCL                                   |
| 5. TV 1a           | LAGALRVAEHFDCIDSFPPEDKIIDFGGSQLHHYSRGDNRVHSSCCPI LGPRDATRHEERMCLRLKMMVQTSDRFVEVPDFCL                                   |
| 6. Ba 1a           | LAGALRVAEHFDCIDSFPPEDKIIDFGGSQLHHYSRGDNRVHSSCCPI LGPRDATRHEERMCLRLKMMVQTSDRFVEVPDFCL                                   |
| Consensus Identity | 170 180 190 200 210 220 230 240<br>NKAEDCNVQADWALCHGGYDMGFQGLCKAMNAHGTRILQGTIMFDGAMLFDQRQGLPLLLQCRWQRVGTGSKEIKKDFI     |
| 1. LyV 1a          | NKAEDCNVQADWALCHGGYDMGFQGLCKAMNAHGTRILQGTIMFDGAMLFDQRQGLPLLLQCRWQRVGTGSKEIKKDFI                                        |
| 2. MV 1a           | NKAEDCNVQADWALCHGGYDMGFQGLCKAMNAHGTRILQGTIMFDGAMLFDQRQGLPLLLQCRWQRVGTGSKEIKKDFI                                        |
| 3. SV 1a           | NKAEDCNVQADWALCHGGYDMGFQGLCKAMNAHGTRILQGTIMFDGAMLFDQRQGLPLLLQCRWQRVGTGSKEIKKDFI                                        |
| 4. TU 1a           | NKAEDCNVQADWALCHGGYDMGFQGLCKAMNAHGTRILQGTIMFDGAMLFDQRQGLPLLLQCRWQRVGTGSKEIKKDFI                                        |
| 5. TV 1a           | NKAEDCNVQADWALCHGGYDMGFQGLCKAMNAHGTRILQGTIMFDGAMLFDQRQGLPLLLQCRWQRVGTGSKEIKKDFI                                        |
| 6. Ba 1a           | NKAEDCNVQADWALCHGGYDMGFQGLCKAMNAHGTRILQGTIMFDGAMLFDQRQGLPLLLQCRWQRVGTGSKEIKKDFI                                        |
| Consensus Identity | 250 260 270 280 290 300 310 320<br>NESTLSYVHDWKNLGSFLTESXYTIGGTTYLLERMLLKCSIMTYKIIATNVRCPPELRLHCIFWENISQYLAVQIPVGYNL   |
| 1. LyV 1a          | NESTLSYVHDWKNLGSFLTESXYTIGGTTYLLERMLLKCSIMTYKIIATNVRCPPELRLHCIFWENISQYLAVQIPVGYNL                                      |
| 2. MV 1a           | NESTLSYVHDWKNLGSFLTESXYTIGGTTYLLERMLLKCSIMTYKIIATNVRCPPELRLHCIFWENISQYLAVQIPVGYNL                                      |
| 3. SV 1a           | NESTLSYVHDWKNLGSFLTESXYTIGGTTYLLERMLLKCSIMTYKIIATNVRCPPELRLHCIFWENISQYLAVQIPVGYNL                                      |
| 4. TU 1a           | NESTLSYVHDWKNLGSFLTESXYTIGGTTYLLERMLLKCSIMTYKIIATNVRCPPELRLHCIFWENISQYLAVQIPVGYNL                                      |
| 5. TV 1a           | NESTLSYVHDWKNLGSFLTESXYTIGGTTYLLERMLLKCSIMTYKIIATNVRCPPELRLHCIFWENISQYLAVQIPVGYNL                                      |
| 6. Ba 1a           | NESTLSYVHDWKNLGSFLTESXYTIGGTTYLLERMLLKCSIMTYKIIATNVRCPPELRLHCIFWENISQYLAVQIPVGYNL                                      |
| Consensus Identity | 330 340 350 360 370 380 390 400<br>NDWRTVRVARATVREVEEISFRCFKENKDWTENMRSVASILSAKSSTVIINGQSIMSGERLDVLEYHLVAFSLTLNLYQKY   |
| 1. LyV 1a          | NDWRTVRVARATVREVEEISFRCFKENKDWTENMRSVASILSAKSSTVIINGQSIMSGERLDVLEYHLVAFSLTLNLYQKY                                      |
| 2. MV 1a           | NDWRTVRVARATVREVEEISFRCFKENKDWTENMRSVASILSAKSSTVIINGQSIMSGERLDVLEYHLVAFSLTLNLYQKY                                      |
| 3. SV 1a           | NDWRTVRVARATVREVEEISFRCFKENKDWTENMRSVASILSAKSSTVIINGQSIMSGERLDVLEYHLVAFSLTLNLYQKY                                      |
| 4. TU 1a           | NDWRTVRVARATVREVEEISFRCFKENKDWTENMRSVASILSAKSSTVIINGQSIMSGERLDVLEYHLVAFSLTLNLYQKY                                      |
| 5. TV 1a           | NDWRTVRVARATVREVEEISFRCFKENKDWTENMRSVASILSAKSSTVIINGQSIMSGERLDVLEYHLVAFSLTLNLYQKY                                      |
| 6. Ba 1a           | NDWRTVRVARATVREVEEISFRCFKENKDWTENMRSVASILSAKSSTVIINGQSIMSGERLDVLEYHLVAFSLTLNLYQKY                                      |
| Consensus Identity | 410 420 430 440 450 460 470 480<br>EKL RNFQGELEWK GWANHFKTRLWWCGRTVSTEGGFRNFLADRLPWKLNTYADSLDFITRI SEVESFEVDSVPTSRLRS  |
| 1. LyV 1a          | EKL RNFQGELEWK GWANHFKTRLWWCGRTVSTEGGFRNFLADRLPWKLNTYADSLDFITRI SEVESFEVDSVPTSRLRS                                     |
| 2. MV 1a           | EKL RNFQGELEWK GWANHFKTRLWWCGRTVSTEGGFRNFLADRLPWKLNTYADSLDFITRI SEVESFEVDSVPTSRLRS                                     |
| 3. SV 1a           | EKL RNFQGELEWK GWANHFKTRLWWCGRTVSTEGGFRNFLADRLPWKLNTYADSLDFITRI SEVESFEVDSVPTSRLRS                                     |
| 4. TU 1a           | EKL RNFQGELEWK GWANHFKTRLWWCGRTVSTEGGFRNFLADRLPWKLNTYADSLDFITRI SEVESFEVDSVPTSRLRS                                     |
| 5. TV 1a           | EKL RNFQGELEWK GWANHFKTRLWWCGRTVSTEGGFRNFLADRLPWKLNTYADSLDFITRI SEVESFEVDSVPTSRLRS                                     |
| 6. Ba 1a           | EKL RNFQGELEWK GWANHFKTRLWWCGRTVSTEGGFRNFLADRLPWKLNTYADSLDFITRI SEVESFEVDSVPTSRLRS                                     |
| Consensus Identity | 490 500 510 520 530 540 550 560<br>FFQKEENIVERAASEIMSANARRIAKKAEMSKEFDDFVDAPEDLAPEDVVEDVINTPV AQDVKPCQSKSETARSIVLDPDA  |
| 1. LyV 1a          | FFQKEENIVERAASEIMSANARRIAKKAEMSKEFDDFVDAPEDLAPEDVVEDVINTPV AQDVKPCQSKSETARSIVLDPDA                                     |
| 2. MV 1a           | FFQKEENIVERAASEIMSANARRIAKKAEMSKEFDDFVDAPEDLAPEDVVEDVINTPV AQDVKPCQSKSETARSIVLDPDA                                     |
| 3. SV 1a           | FFQKEENIVERAASEIMSANARRIAKKAEMSKEFDDFVDAPEDLAPEDVVEDVINTPV AQDVKPCQSKSETARSIVLDPDA                                     |
| 4. TU 1a           | FFQKEENIVERAASEIMSANARRIAKKAEMSKEFDDFVDAPEDLAPEDVVEDVINTPV AQDVKPCQSKSETARSIVLDPDA                                     |
| 5. TV 1a           | FFQKEENIVERAASEIMSANARRIAKKAEMSKEFDDFVDAPEDLAPEDVVEDVINTPV AQDVKPCQSKSETARSIVLDPDA                                     |
| 6. Ba 1a           | FFQKEENIVERAASEIMSANARRIAKKAEMSKEFDDFVDAPEDLAPEDVVEDVINTPV AQDVKPCQSKSETARSIVLDPDA                                     |
| Consensus Identity | 570 580 590 600 610 620 630 640<br>VLKNGAINEFADYSKRLHENTVSNLRHLWTLMGCRGNEIHNK SVAETYHRVDDMVNVHFPNGHWMYPLKYEYTVGYNDGGL  |
| 1. LyV 1a          | VLKNGAINEFADYSKRLHENTVSNLRHLWTLMGCRGNEIHNK SVAETYHRVDDMVNVHFPNGHWMYPLKYEYTVGYNDGGL                                     |
| 2. MV 1a           | VLKNGAINEFADYSKRLHENTVSNLRHLWTLMGCRGNEIHNK SVAETYHRVDDMVNVHFPNGHWMYPLKYEYTVGYNDGGL                                     |
| 3. SV 1a           | VLKNGAINEFADYSKRLHENTVSNLRHLWTLMGCRGNEIHNK SVAETYHRVDDMVNVHFPNGHWMYPLKYEYTVGYNDGGL                                     |
| 4. TU 1a           | VLKNGAINEFADYSKRLHENTVSNLRHLWTLMGCRGNEIHNK SVAETYHRVDDMVNVHFPNGHWMYPLKYEYTVGYNDGGL                                     |
| 5. TV 1a           | VLKNGAINEFADYSKRLHENTVSNLRHLWTLMGCRGNEIHNK SVAETYHRVDDMVNVHFPNGHWMYPLKYEYTVGYNDGGL                                     |
| 6. Ba 1a           | VLKNGAINEFADYSKRLHENTVSNLRHLWTLMGCRGNEIHNK SVAETYHRVDDMVNVHFPNGHWMYPLKYEYTVGYNDGGL                                     |
| Consensus Identity | 650 660 670 680 690 700 710 720<br>GEKFENELYVVDKTCSCANAKAIADACKKVSAPTCSVVMVDGVAGCGKTTAIKETFRFEKDIIVTANRKS AEDVRKALIFGD |
| 1. LyV 1a          | GEKFENELYVVDKTCSCANAKAIADACKKVSAPTCSVVMVDGVAGCGKTTAIKETFRFEKDIIVTANRKS AEDVRKALIFGD                                    |
| 2. MV 1a           | GEKFENELYVVDKTCSCANAKAIADACKKVSAPTCSVVMVDGVAGCGKTTAIKETFRFEKDIIVTANRKS AEDVRKALIFGD                                    |
| 3. SV 1a           | GEKFENELYVVDKTCSCANAKAIADACKKVSAPTCSVVMVDGVAGCGKTTAIKETFRFEKDIIVTANRKS AED                                             |
