# Supplementary material for: Variability among the Isolates of Broad Bean Mottle Virus and Encapsidation of Host RNAs
Source: MDPI journal article supplement (doi:10.3390/pathogens11070817), 2022-07-21
Supplement: s1 [file s1]

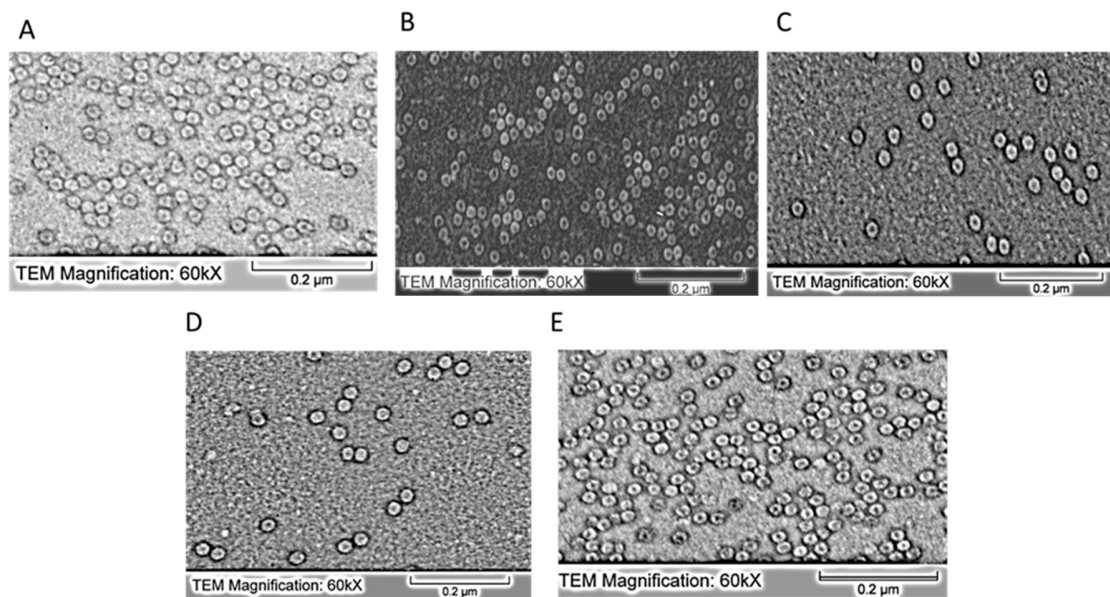

**Figure S1.** Transmission electron microscopy of extensively purified preparations of five BBMV isolates from the broad bean leaves. A) LyV, B) MV, C) SV, D) TU, E) TV. The characteristic spherical virions with an average diameter of 27-30nm (n=20, scale  $\mu\text{m}$ ) can be observed.

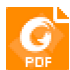

Foxit Reader PDF  
Document

**Figure S2.** The MSA of amino acid sequences of proteins 1a of five new BBMV isolates as compared to the Ba isolate. The identical aa are marked with the green color whereas the polymorphic regions with the olive color. The numerical scale on top marks the positions of amino acids.

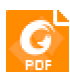

Foxit Reader PDF  
Document

**Figure S3.** The MSA of amino acid sequences of proteins 2a of five new BBMV isolates as compared to Ba isolate. The identical aa are marked with the green color whereas the polymorphic regions with the olive color. The numerical scale on top marks the positions of amino acids. The conserved GDD motif is highlighted by red box.

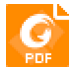

Foxit Reader PDF  
Document

**Figure S4.** The MSA of amino acid sequences of proteins 3a of five new BBMV isolates as compared to Ba isolate. The identical aa are marked with the green color whereas the polymorphic regions with the olive color. The numerical scale on top marks the positions of amino acids.

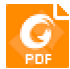

Foxit Reader PDF  
Document

**Figure S5.** The MSA of amino acid sequences of 4a protein (CP) of five new BBMV isolates as compared to Ba isolate. The identical aa are marked with the green color whereas the polymorphic regions with the olive color. The numerical scale on top marks the positions of amino acids. The N-terminal RQLAL and SNLRL motifs are highlighted by the red box.

**Table S1.** Summary of distribution of the RNA segments encapsidated in the BBMV isolates <sup>1)</sup>.

| Strains     | LyV            |            | MV             |            | SV             |            | TU             |            | TV             |            |
|-------------|----------------|------------|----------------|------------|----------------|------------|----------------|------------|----------------|------------|
|             | # of Reads     | % of Reads |
| Total Viral | 6922905        |            | 6822115        |            | 6816035        |            | 7158908        |            | 7702516        |            |
|             | 1              |            | 1              |            | 5              |            | 5              |            | 8              |            |
| RNA1        | 3229947        | 47.93%     | 2872826        | 43.51%     | 3585220        | 54.04%     | 3466715        | 49.81%     | 2779794        | 37.53%     |
|             | 1              |            | 0              |            | 6              |            | 2              |            | 5              |            |
| RNA2        | 2604159        | 38.65%     | 2553606        | 38.68%     | 2316636        | 34.92%     | 2662822        | 38.26%     | 3374537        | 45.56%     |
|             | 5              |            | 7              |            | 9              |            | 2              |            | 7              |            |
| RNA3        | 9044034        | 13.42%     | 1176127        | 17.81%     | 7330627        | 11.05%     | 8306709        | 11.93%     | 1251855        | 16.90%     |
|             |                |            | 1              |            |                |            |                |            | 8              |            |
| Total Viral | <b>6738510</b> |            | <b>6602559</b> |            | <b>6634920</b> |            | <b>6960208</b> |            | <b>7406188</b> |            |
|             | <b>0</b>       |            | <b>8</b>       |            | <b>2</b>       |            | <b>3</b>       |            | <b>0</b>       |            |
| Non-viral   | 1843951        | 2.66%      | 2195553        | 3.22%      | 1811153        | 2.66%      | 1987002        | 2.78%      | 2963288        | 3.85%      |

<sup>1)</sup> Based on the number of reads of the NGS RNA Seq.

**Table S2.** Summary of reads that mapped to BBMV and Broad bean references.

|            | LyV             |              | MV              |              | SV              |            | TU              |            | TV              |            |
|------------|-----------------|--------------|-----------------|--------------|-----------------|------------|-----------------|------------|-----------------|------------|
|            | Reads           | % of total   | Reads           | % of total   | Reads           | % of total | Reads           | % of total | Reads           | % of total |
| Total      | 69229051        |              | 68221151        |              | 68160354        |            | 71589083        |            | 77025168        |            |
| RNA1       | 32649320        | 47.16        | 29071640        | 42.61        | 36218467        | 53.14      | 35025952        | 48.93      | 28138605        | 36.53      |
| RNA2       | 26305408        | 38.00        | 25822064        | 37.85        | 23415810        | 34.35      | 26909577        | 37.59      | 34146453        | 44.33      |
| RNA3       | 9101173         | 13.15        | 12052263        | 17.67        | 7457385         | 10.94      | 8449249         | 11.80      | 12761912        | 16.57      |
| Viral      | <b>68055901</b> | <b>98.31</b> | <b>66945967</b> | <b>98.13</b> | <b>67091662</b> | 98.43      | <b>70384778</b> | 98.32      | <b>75046970</b> | 97.43      |
| Non-Viral  | 1173150         | 1.69         | 1275184         | 1.87         | 1068692         | 1.57       | 1204305         | 1.68       | 1978198         | 2.57       |
| Host       | 789386          | 1.14         | 913243          | 1.34         | 759606          | 1.11       | 934017          | 1.30       | 1501568         | 1.95       |
| Unassigned | 383764          |              | 361941          |              | 309086          |            | 270288          |            | 476630          |            |

**Table S3.** Summary of reads mapped to host RNAs encoded in different cellular compartments.

|                      | LyV           |                 | MV            |                 | SV            |                 | TU            |                 | TV             |                 |
|----------------------|---------------|-----------------|---------------|-----------------|---------------|-----------------|---------------|-----------------|----------------|-----------------|
|                      | Reads         | % Of host reads | Reads          | % Of host reads |
| <b>Nuclear</b>       | <b>788848</b> | <b>99.93</b>    | <b>911790</b> | <b>99.84</b>    | <b>758696</b> | <b>99.88</b>    | <b>932412</b> | <b>99.83</b>    | <b>1500263</b> | <b>99.91</b>    |
| mRNA                 | 372824        | 47.23           | 391850        | 42.91           | 293364        | 38.62           | 304523        | 32.60           | 434434         | 28.93           |
| rRNA                 | 383611        | 48.60           | 498545        | 54.59           | 443941        | 58.44           | 608020        | 65.10           | 1030021        | 68.60           |
| Others               | 32413         | 4.11            | 21395         | 2.34            | 21391         | 2.82            | 19869         | 2.13            | 35808          | 2.38            |
| <b>Mitochondrial</b> | <b>2</b>      | <b>0.00</b>     | <b>46</b>     | <b>0.01</b>     | <b>7</b>      | <b>0.00</b>     | <b>16</b>     | <b>0.00</b>     | <b>13</b>      | <b>0.00</b>     |
| mRNA                 | 0             | 0.00            | 18            | 0.00            | 4             | 0.00            | 6             | 0.00            | 4              | 0.00            |
| rRNA                 | 2             | 0.00            | 28            | 0.00            | 3             | 0.00            | 10            | 0.00            | 8              | 0.00            |
| Others               | 0             | 0.00            | 0             | 0.00            | 0             | 0.00            | 0             | 0.00            | 1              | 0.00            |
| <b>Plastid</b>       | <b>536</b>    | <b>0.07</b>     | <b>1407</b>   | <b>0.15</b>     | <b>903</b>    | <b>0.12</b>     | <b>1589</b>   | <b>0.17</b>     | <b>1292</b>    | <b>0.09</b>     |
| mRNA                 | 129           | 0.02            | 280           | 0.03            | 62            | 0.01            | 545           | 0.06            | 313            | 0.02            |
| rRNA                 | 366           | 0.05            | 1082          | 0.12            | 817           | 0.11            | 990           | 0.11            | 907            | 0.06            |
| Others               | 41            | 0.01            | 45            | 0.00            | 24            | 0.00            | 54            | 0.01            | 72             | 0.00            |
| <b>Total</b>         | <b>789386</b> |                 | <b>913243</b> |                 | <b>759606</b> |                 | <b>934017</b> |                 | <b>1501568</b> |                 |
| TE                   | 39627         |                 | 26608         |                 | 15880         |                 | 20667         |                 | 32310          |                 |

**Table S4.** The major host mRNAs encapsidated in five BBMV isolates.

| Reference                          | Transcript Name                                                                                          | Number of Reads |        |        |        |        |
|------------------------------------|----------------------------------------------------------------------------------------------------------|-----------------|--------|--------|--------|--------|
|                                    |                                                                                                          | LyV             | MV     | SV     | TU     | TV     |
| v.faba_CSFL_reftra<br>nsV2_0011664 | photosystem II repair protein PSB27-H1,<br>chloroplastic OS=Cicer arietinum<br>GN=LOC101500783 PE=3 SV=1 | 171484          | 176866 | 157899 | 198165 | 222801 |
| v.faba_csfl_reftrans<br>V1_0044601 | NA                                                                                                       | 62872           | 28410  | 28765  | 23224  | 50004  |
| v.faba_csfl_reftrans<br>V1_0015684 | 40S ribosomal protein S25 (Fragment)<br>OS=Cricetulus griseus GN=I79_020113 PE=4<br>SV=1                 | 35890           | 21939  | 12369  | 14823  | 22730  |
| v.faba_CSFL_reftra<br>nsV2_0001947 | Uncharacterized protein OS=Lupinus<br>angustifolius GN=TanjilG_03599 PE=4 SV=1                           | 1507            | 1205   | 912    | 1312   | 1513   |
| v.faba_csfl_reftrans<br>V1_0056153 | Fructose-bisphosphate aldolase OS=Medicago<br>truncatula GN=MTR_4g071860 PE=3 SV=1                       | 850             | 805    | 573    | 833    | 1145   |
| v.faba_csfl_reftrans<br>V1_0012340 | Uncharacterized protein OS=Glycine max PE=4<br>SV=1                                                      | 782             | 1018   | 661    | 1084   | 1407   |
| v.faba_CSFL_reftra<br>nsV2_0006213 | heat shock cognate 70 kDa protein 2-like<br>OS=Cicer arietinum GN=LOC101502845 PE=3<br>SV=1              | 716             | 315    | 281    | 416    | 468    |
| v.faba_CSFL_reftra<br>nsV2_0000502 | Uncharacterized protein OS=Medicago truncatula<br>GN=MTR_0052s0170 PE=4 SV=1                             | 704             | 562    | 399    | 552    | 1097   |
| v.faba_csfl_reftrans<br>V1_0037233 | Uncharacterized protein OS=Glycine max PE=4<br>SV=1                                                      | 699             | 944    | 652    | 1042   | 1255   |
| v.faba_CSFL_reftra<br>nsV2_0009840 | Uncharacterized protein OS=Lupinus<br>angustifolius GN=TanjilG_03599 PE=4 SV=1                           | 673             | 967    | 663    | 1014   | 1234   |
| v.faba_csfl_reftrans<br>V1_0033771 | Ribosome biogenesis GTP-binding protein YsxC<br>OS=Medicago truncatula GN=MTR_3g109540<br>PE=3 SV=1      | 160             | 50596  | 27161  | 28     | 52     |
| v.faba_CSFL_reftra<br>nsV2_0032752 | GTP-binding protein At2g22870 OS=Cicer<br>arietinum GN=LOC101508363 PE=3 SV=1                            | 132             | 50117  | 27189  | 25     | 41     |
| v.faba_csfl_reftrans<br>V1_0043170 | Uncharacterized protein OS=Glycine max PE=4<br>SV=1                                                      | 529             | 1504   | 765    | 1215   | 835    |
| v.faba_csfl_reftrans<br>V1_0011896 | Uncharacterized protein OS=Medicago truncatula<br>GN=MTR_5g089380 PE=4 SV=1                              | 575             | 1202   | 572    | 692    | 470    |
| v.faba_CSFL_reftra<br>nsV2_0019991 | Transmembrane protein, putative OS=Medicago<br>truncatula GN=MTR_5g037260 PE=4 SV=1                      | 369             | 970    | 488    | 498    | 393    |
| v.faba_csfl_reftrans<br>V1_0037237 | Uncharacterized protein OS=Glycine max PE=4<br>SV=1                                                      | 441             | 568    | 378    | 515    | 1387   |
| v.faba_csfl_reftrans<br>V1_0037958 | Uncharacterized protein OS=Medicago truncatula<br>GN=MTR_8g073305 PE=4 SV=1                              | 258             | 36     | 23     | 214    | 1151   |

<sup>1)</sup> The reads that did not map to BBMV reference were mapped to the transcriptome database of *Vicia faba*. Then the top ten most mapped reads to the mRNA transcript for the five BBMV isolates were extracted. The common transcripts were combined such that all five strains have ten of them as top hits. The reads for organellar RNAs were very low in BBMV and thus are not included in this table.

**Table S5.** Summary of the transposable elements among the encapsidated host mRNA transcripts<sup>1)</sup>

| Transposable Elements |           | Number of Reads |              |              |              |              |
|-----------------------|-----------|-----------------|--------------|--------------|--------------|--------------|
| <b>Class I</b>        | Order     | LyV             | MV           | SV           | TU           | TV           |
|                       | DIRS      | 374             | 333          | 343          | 482          | 651          |
|                       | LARD      | 13              | 15           | 13           | 19           | 43           |
|                       | LINE      | 33289           | 21145        | 11784        | 14247        | 21912        |
|                       | LTR-Copia | 3179            | 2646         | 2193         | 3038         | 4927         |
|                       | LTR-Gypsy | 170             | 147          | 65           | 89           | 148          |
|                       | LTR SINE  | 100             | 266          | 99           | 130          | 164          |
|                       | TRIM      | 3               | 22           | 10           | 19           | 11           |
| <b>Class II</b>       | Unknown   | 37              | 36           | 23           | 23           | 41           |
|                       | Helitron  | 24              | 19           | 16           | 22           | 46           |
|                       | MITE      | 0               | 3            | 5            | 1            | 2            |
|                       | TIR       | 308             | 136          | 59           | 112          | 312          |
| <b>Unknown</b>        |           | <b>2130</b>     | <b>1840</b>  | <b>1270</b>  | <b>2485</b>  | <b>4053</b>  |
| <b>Total</b>          |           | <b>39627</b>    | <b>26608</b> | <b>15880</b> | <b>20667</b> | <b>32310</b> |

<sup>1)</sup> The table shows the portion of host transcripts that correspond to transposable elements. The reads that mapped to the mRNA transcripts were then mapped to the TE database that was downloaded from RepetDB (Amselem et al., 2019). Retro transposons (Class I) like LINE and LTR predominate among the reads shown in this table.

**Table S6.** The comparison of the average number of reads mapped to host RNAs originating from three different host cellular compartments in BMV vs BBMV <sup>1)</sup>

| Compartments  | RNA     | Average Reads Mapped |                 |
|---------------|---------|----------------------|-----------------|
|               |         | BMV                  | BBMV            |
| Nuclear       | mRNA    | 23172                | 359399          |
| Nuclear       | rRNA    | 976                  | 592827.6        |
| Nuclear       | genomic | 1708.5               | 26175.2         |
| Mitochondrial | mRNA    | 6713                 | 6.4             |
| Mitochondrial | rRNA    | 552                  | 10.2            |
| Plastid       | mRNA    | 16958.5              | 265.8           |
| Plastid       | rRNA    | 370                  | 832.4           |
| <b>Total</b>  |         | <b>50450</b>         | <b>979516.6</b> |

<sup>1)</sup> For BMV, the reads mapped to host RNAs were averaged between two different virus purifications from barley (Shrestha et al., 2018) whereas for BBMV, the data were averaged from five virion purifications. The average number of reads for BBMV that mapped to the host RNAs were 19.4 times higher than that for BMV. Among the BMV host reads, little over 50% of reads mapped to the host nuclear RNAs, whereas for BBMV, more than 99% reads mapped to the host nuclear RNAs and <0.1% reads mapped to organellar RNAs.
