# Supplementary figures and images for: Variability among the Isolates of Broad Bean Mottle Virus and Encapsidation of Host RNAs
Source: MDPI journal article supplement (doi:10.3390/pathogens11070817), 2022-07-21

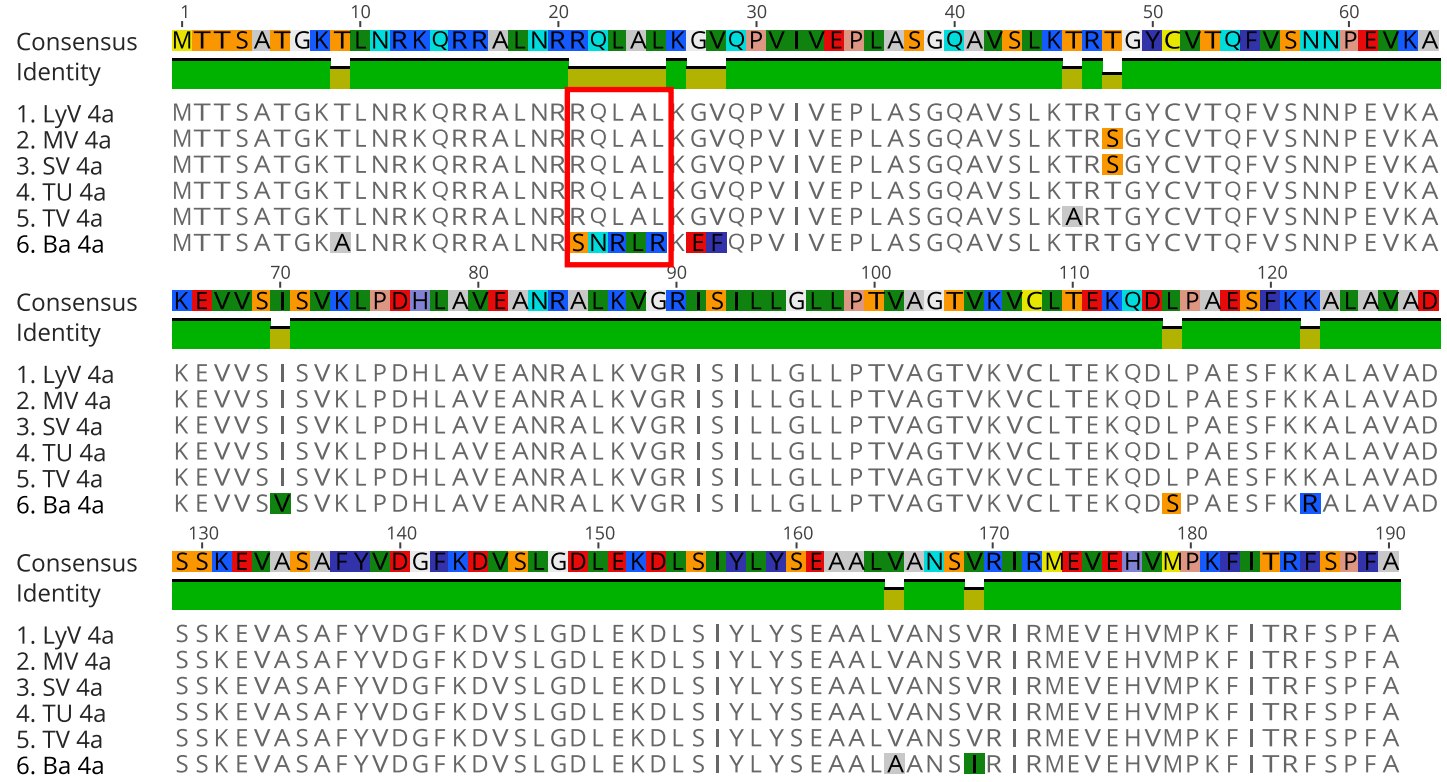

Supplement: s1 [file s1]

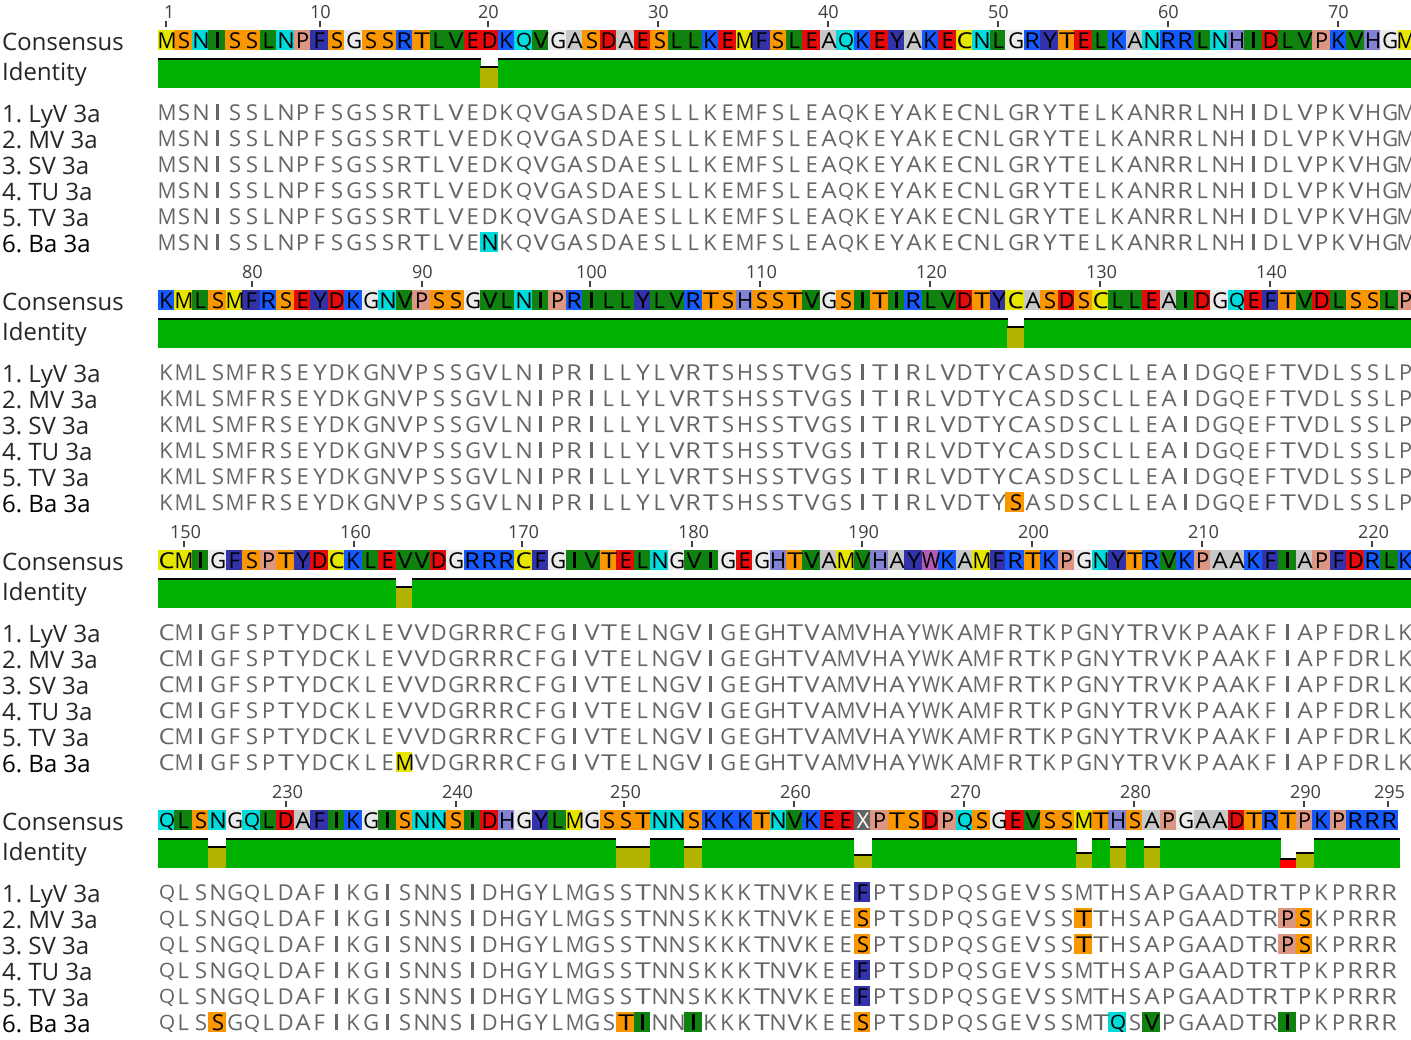

Supplement: s1 [file s1]
